# Supplementary figures and images for: phishGILLNET—phishing detection methodology using probabilistic latent semantic analysis, AdaBoost, and co-training
Source: Springer Nature journal article supplement (doi:10.1186/1687-417x-2012-1), 2012-03-26

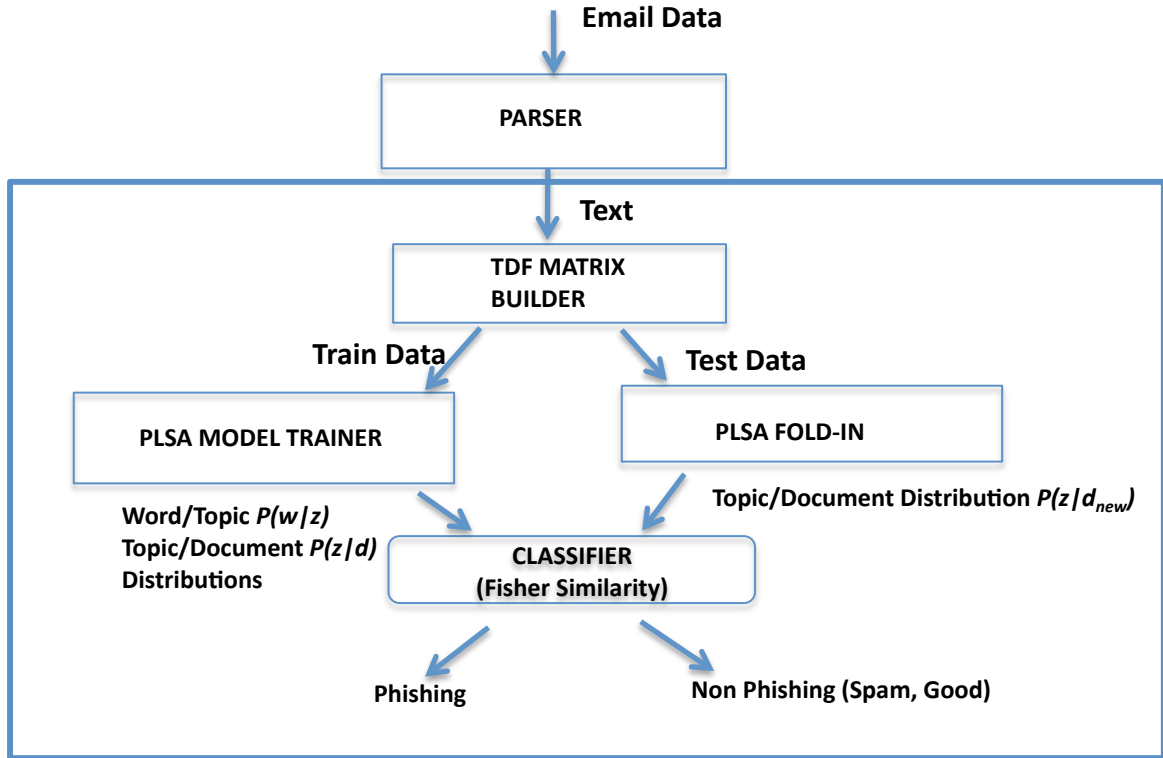

Supplement: 13635_2011_9_MOESM6_ESM.pdf [file 13635_2011_9_MOESM6_ESM.pdf]
